# Supplementary material for: A microfluidic microalgae detection system for cellular physiological response based on an object detection algorithm
Source: Royal Society of Chemistry journal article supplement (doi:10.1039/d3lc00941f), 2024-01-01
Supplement: d3lc00941f1.pdf [file d3lc00941f1.pdf]

## Supplementary Information

A microfluidic microalgae detection system for cellular physiological response based on object detection algorithm

Shizheng Zhou a, d, Tianhui Chen a, Edgar S Fu b, Teng Zhou c, Liuyong Shi c and Hong Yan a, d \*

*a. State Key Laboratory of Marine Resource Utilization in South China Sea, Hainan University, Haikou 570228, China.*

*b. Graduate School of Computing and Information Science, University of Pittsburgh, PA 15260, USA*

Content:

Table S1. Detection performance of each trick after model optimization.

Fig. S1. The microfluidic chip schematic diagram

Fig. S2. Cell activity after adding sorbitol

Fig. S3. The structure of Bi-Level Routing Attention

Fig. S4. The training and validation loss of the optimized model

Fig. S5. The confusion matrix of the baseline model

**Table. S1** Detection performance after model optimization.

| Data Aug      | Optimizer  | Act Func   | Loss Func         | Architecture                | <i>Plat</i> | <i>Chlo</i> | <i>Duna</i> | <i>Sym</i> | <i>Porp</i> | <i>Hae</i> | mAP          |
|---------------|------------|------------|-------------------|-----------------------------|-------------|-------------|-------------|------------|-------------|------------|--------------|
| <b>None</b>   | SGD        | SiLU       | CloU              | YOLOv8n (baseline)          | 0.890       | 0.475       | 0.848       | 0.983      | 0.967       | 0.989      | 0.859        |
| <b>Mosaic</b> | SGD        | SiLU       | CloU              | YOLOv8n                     | 0.934       | 0.696       | 0.883       | 0.982      | 0.978       | 0.984      | 0.909        |
| <b>MixUp</b>  | SGD        | SiLU       | CloU              | YOLOv8n                     | 0.931       | 0.553       | 0.865       | 0.973      | 0.970       | 0.986      | 0.88         |
| <b>Both</b>   | SGD        | SiLU       | CloU              | YOLOv8n                     | 0.967       | 0.711       | 0.934       | 0.991      | 0.978       | 0.992      | 0.929        |
| <b>Both</b>   | Adam       | SiLU       | CloU              | YOLOv8n                     | 0.946       | 0.653       | 0.923       | 0.987      | 0.980       | 0.991      | 0.913        |
| <b>Both</b>   | RMSProp    | SiLU       | CloU              | YOLOv8n                     | 0.928       | 0.615       | 0.932       | 0.985      | 0.976       | 0.984      | 0.903        |
| <b>Both</b>   | SGD        | ReLU       | CloU              | YOLOv8n                     | 0.945       | 0.719       | 0.941       | 0.990      | 0.969       | 0.987      | 0.925        |
| <b>Both</b>   | SGD        | Leaky ReLU | CloU              | YOLOv8n                     | 0.946       | 0.717       | 0.942       | 0.981      | 0.979       | 0.991      | 0.926        |
| <b>Both</b>   | SGD        | ELU        | CloU              | YOLOv8n                     | 0.939       | 0.726       | 0.949       | 0.989      | 0.970       | 0.992      | 0.928        |
| <b>Both</b>   | SGD        | ELU        | SloU              | YOLOv8n                     | 0.934       | 0.749       | 0.936       | 0.991      | 0.982       | 0.986      | 0.930        |
| <b>Both</b>   | SGD        | ELU        | Focal_EIoU        | YOLOv8n                     | 0.960       | 0.762       | 0.953       | 0.992      | 0.974       | 0.991      | 0.939        |
| <b>Both</b>   | SGD        | ELU        | GIoU              | YOLOv8n                     | 0.937       | 0.742       | 0.953       | 0.990      | 0.982       | 0.985      | 0.932        |
| <b>Both</b>   | SGD        | ELU        | DIoU              | YOLOv8n                     | 0.956       | 0.752       | 0.942       | 0.991      | 0.982       | 0.990      | 0.936        |
| <b>Both</b>   | SGD        | ELU        | Focal_EIoU        | YOLOv8n + p2                | 0.925       | 0.845       | 0.960       | 0.979      | 0.980       | 0.961      | 0.942        |
| <b>Both</b>   | <b>SGD</b> | <b>ELU</b> | <b>Focal_EIoU</b> | <b>YOLOv8n + p2 + BiLRA</b> | 0.949       | 0.873       | 0.937       | 0.988      | 0.983       | 0.983      | <b>0.952</b> |

The bolded text indicates the way in which the model detection performance is most improved among the various tricks in this column. *Plat*: Platymonas; *Chlo*: Chlorella; *Duna*: Dunaliella salina; *Sym*: Symbiodinium; *Porp*: Porphyridium; *Hae*: Haematococcus; **Both**: Mosaic + MixUp; BiLRA: Bi-Level Routing Attention

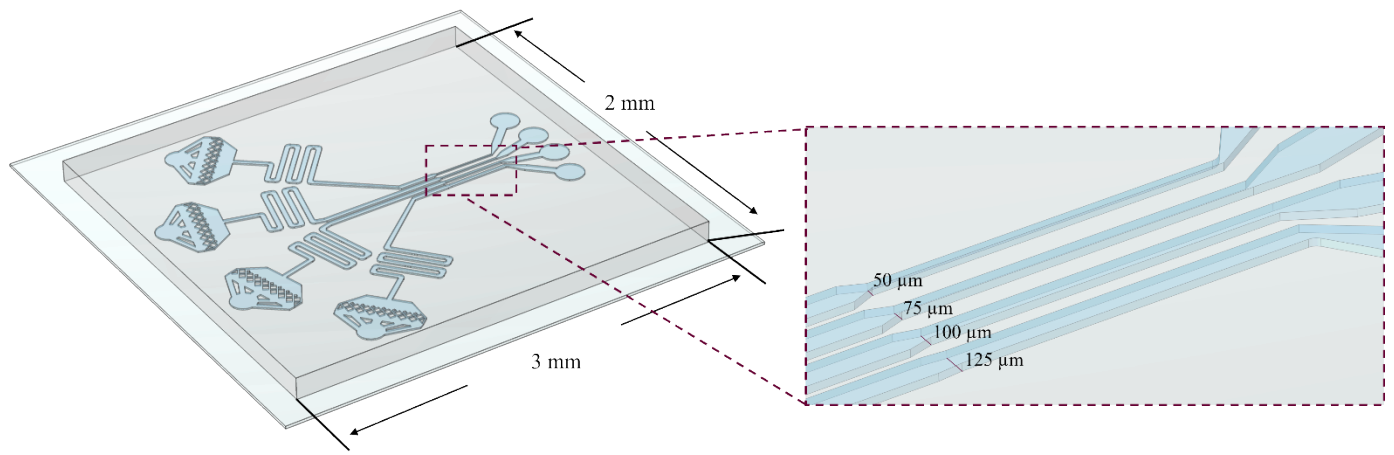

**Fig. S1** The microfluidic chip schematic diagram

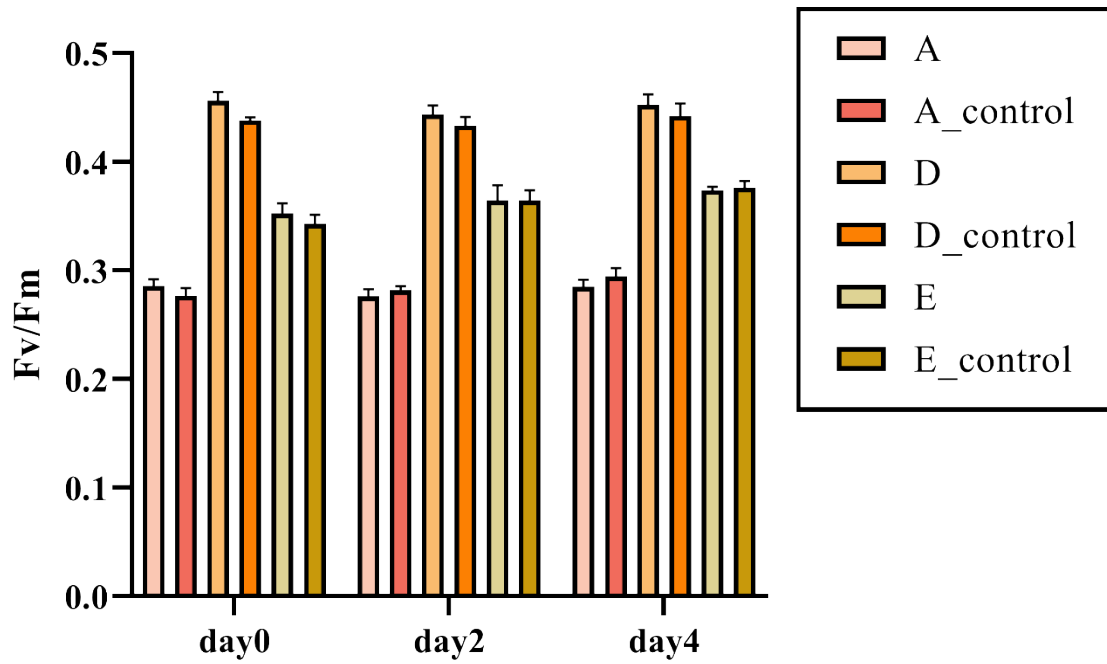

**Fig. S2** Cell activity after adding sorbitol. the "control" group represents cell samples treated with sorbitol. Under the same culture conditions, the measurements of maximum photosynthetic efficiency in samples with added sorbitol are nearly identical to the original samples. Moreover, after 4 days, there is a slight increase in activity.

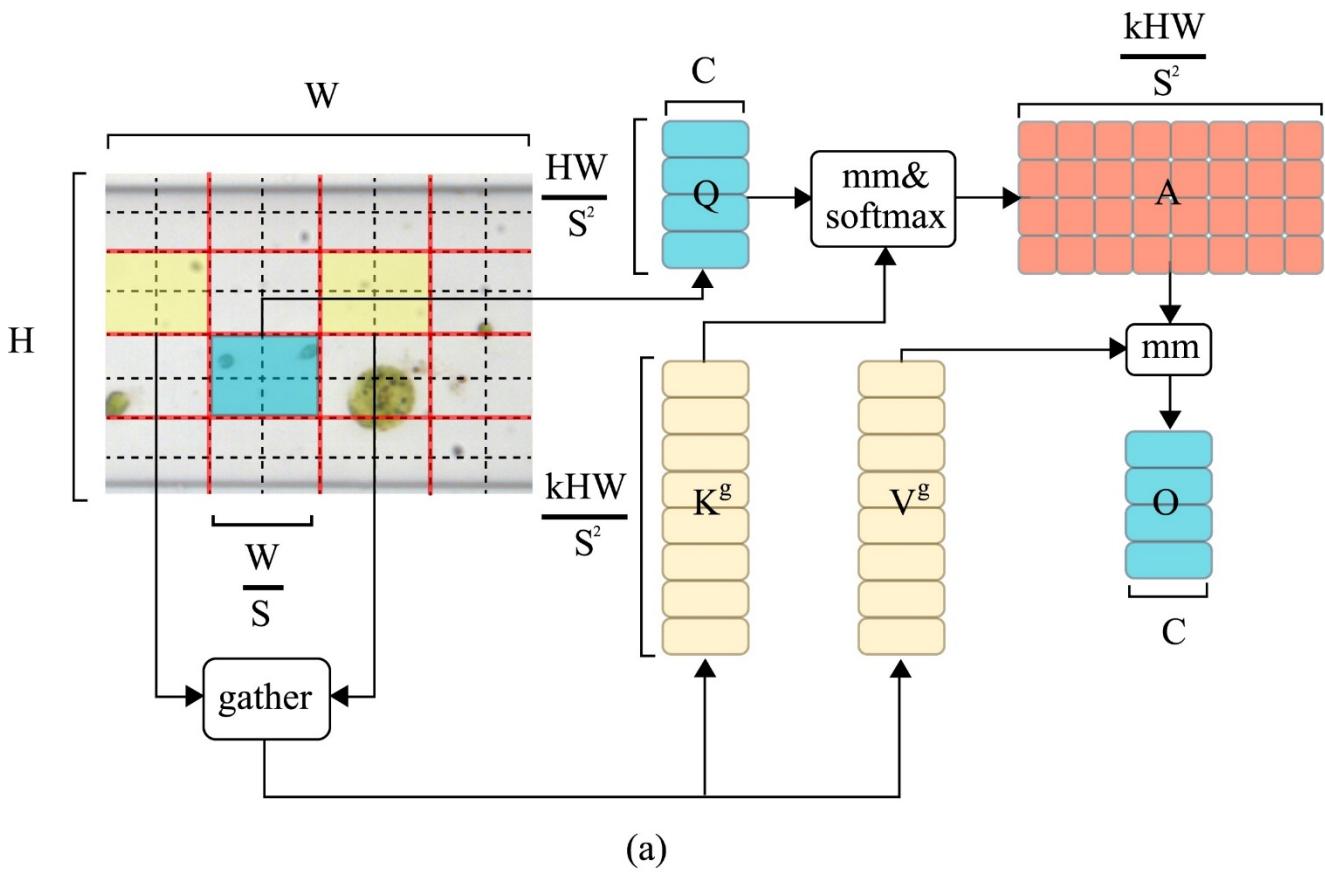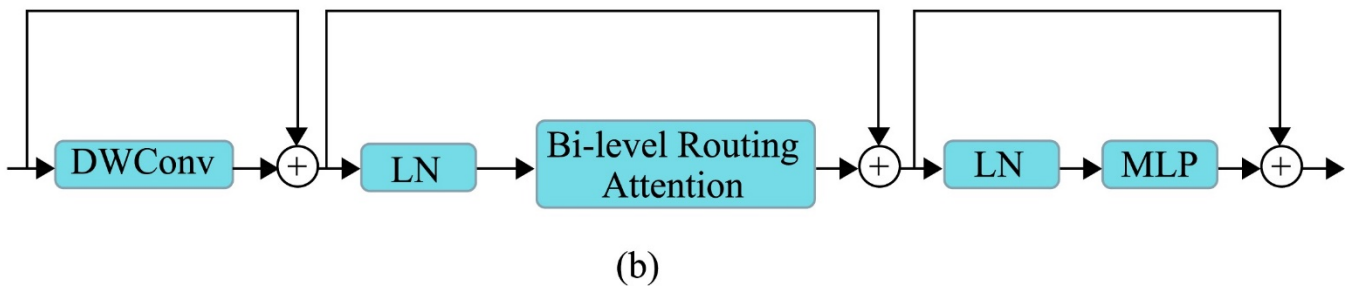

**Fig. S2** The structure of Bi-Level Routing Attention <sup>1</sup>. (a) The schematic diagram of Bi-Level Routing Attention; (b) Details of the BiFormer block

**Reference**

1. L. Zhu, X. Wang, Z. Ke, W. Zhang and R. Lau, *Journal*, 2023, DOI: 10.48550/arXiv.2303.08810, arXiv:2303.08810.

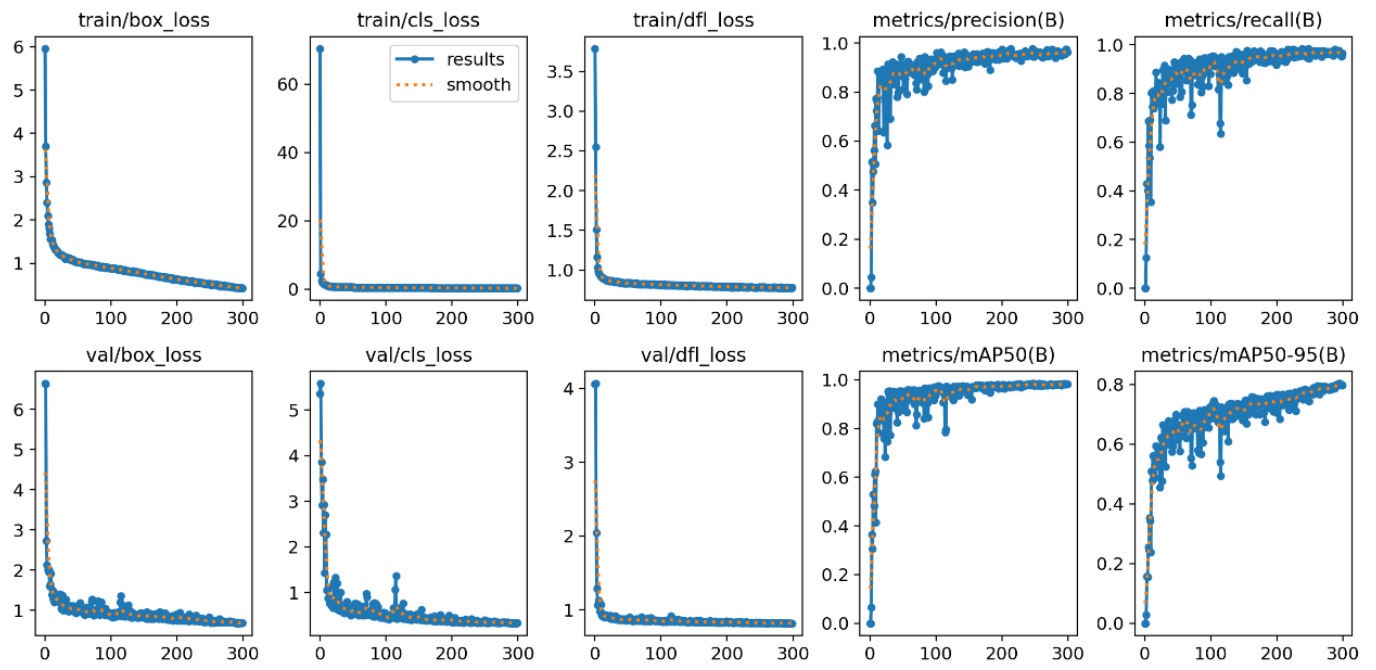

**Fig. S3** The training and validation loss of the optimized model

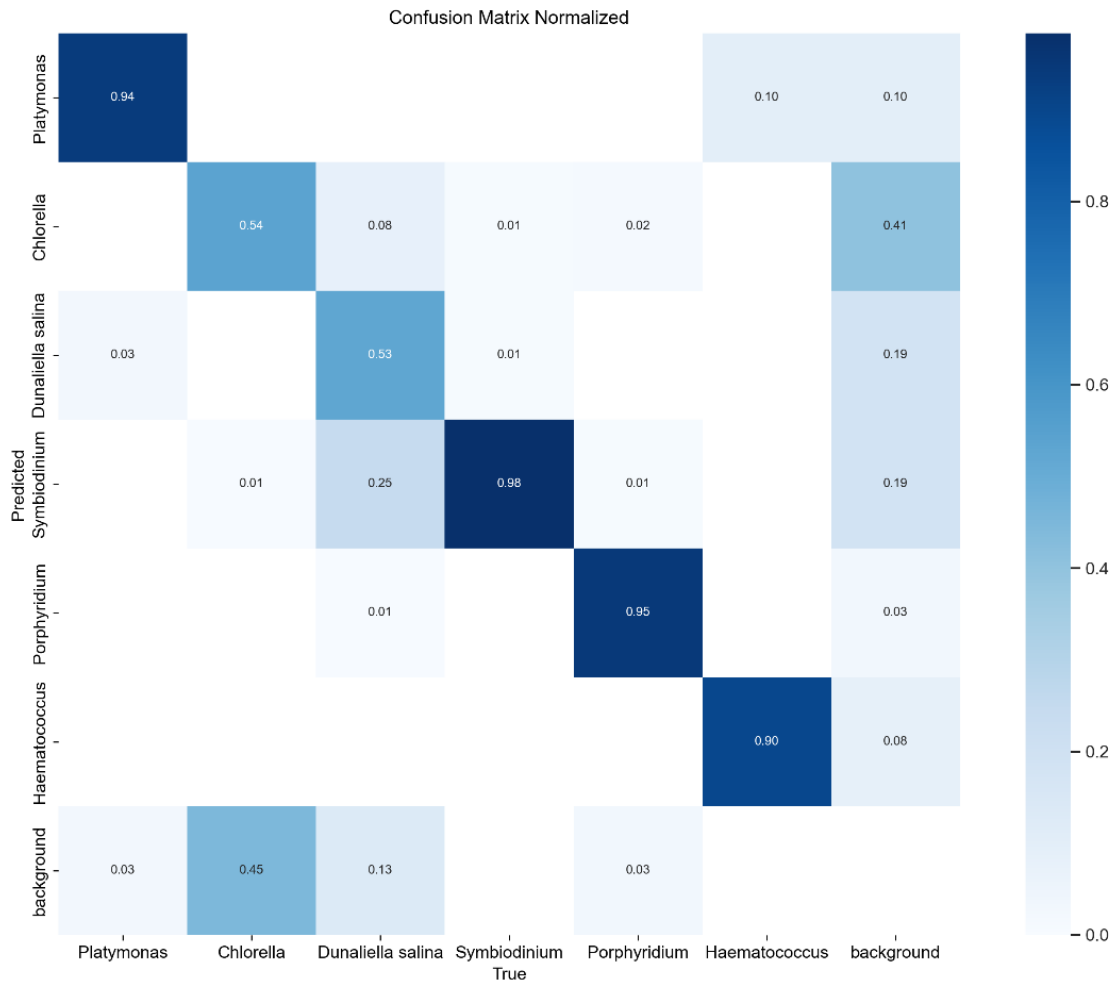

**Fig. S4** The confusion matrix of the baseline model
